# Supplementary material for: Integrated Bioinformatics Analysis Identifies Hub Genes Associated with the Pathogenesis and Prognosis of Esophageal Squamous Cell Carcinoma
Source: Biomed Res Int. 2019 Dec 26;2019:2615921. doi: 10.1155/2019/2615921 (PMC6948276; doi:10.1155/2019/2615921)
Supplement: Supplementary Materials — Table S1: A total of 345 overlapping DEGs were identified from GSE20347, GSE23400, and GSE26886. [file 2615921.f1.xlsx]

## Sheet: Table S1
Table S1. A total of 345 overlapping DEGs (including 142 up-regulated and 203 down-regulated DEGs) were identified from three microarray datasets in the GEO database
DEGs	Genes symbol
142 Upregulated DEGs	ECT2, U2SURP, HLTF, TRIP13, FNDC3B, MFHAS1, CENPF, LAPTM4B, MMP12, EPCAM, ACTL6A, CKS1B, IGF2BP2, RFC4, KIF14, UBE2C, RAD51AP1, SERPINH1, TTK, MARCKSL1, PLAU, SPP1, DLGAP5, CDKN3, MEST, HMGB3, MFAP2, SNAI2, TIMP1, MMD, MMP11, SLC39A14, CXCL8, FANCI, ENAH, ACKR3, RAI14, MTERF3, MMP1, COL11A1, FSCN1, AGRN, DPY19L4, PLXNA1, MYO10, LRRC8D, DNMT1, ASPM, ODC1, ITPR3, SULF1, PFN2, SLC25A32, GMPS, VCAN, …
203 Downregulated DEGs	ENDOU, EPB41L3, MAB21L4, GDPD, CXCR2, CRISP3, UBL3, EREG, KAT2B, PPP1R3C, SLURP1, BLNK, OR7E14P, ACPP, GYS2, CRYBG1, RANBP9, EPS8L2, SCNN1B, CWH43, NUCB2, SLC24A3, RMND5B, TP53I3, EHD3, SORT1, STN1, SASH1, CLIC3, NPEPPS, ABLIM3, PRSS3, KIAA0232, EVPL, ZDHHC13, DHRS1, SMAGP, PMM1, RAB25, COBL, SPINK5, AGFG2, MGLL, DOCK9, TMOD3, ACOX1, MXD1, SCEL, EPS8L1, ECM1, ANXA11, ABLIM1, SLK, DUOX1, HOPX, TRI…
